# Supplementary material
Source: publisher figshare collection journal article supplement (https://asha.figshare.com/articles/dataset/_/14963955)
Supplement: Supplementary file 1 [file 1]

**Supplemental Material S1.** Fixed and random effects in a mixed-effects model of median fundamental frequency ( $f_0$ ).

| <b>Fixed effects</b>  |               | <b>Estimate</b> | <b><i>SE</i></b> | <b><i>t</i></b> | <b>Estimated <i>p</i></b> |
|-----------------------|---------------|-----------------|------------------|-----------------|---------------------------|
| (intercept)           |               | 81.02           | 0.85             | <b>95.27</b>    | <.001                     |
| Condition             | DEG           | 1.39            | 0.16             | <b>8.46</b>     | <.001                     |
| Sex                   | Female        | 10.13           | 1.26             | <b>8.03</b>     | <.001                     |
| Age band              | 9–10          | 15.06           | 1.10             | <b>13.70</b>    | <.001                     |
|                       | 11–12         | 14.11           | 1.30             | <b>10.82</b>    | <.001                     |
|                       | 13–14         | 7.35            | 1.04             | <b>7.09</b>     | <.001                     |
| Age band * Sex        | 9–10, Female  | –8.26           | 1.63             | <b>–5.07</b>    | <.001                     |
|                       | 11–12, Female | –9.30           | 1.75             | <b>–5.31</b>    | <.001                     |
|                       | 13–14, Female | –4.85           | 1.53             | <b>–3.17</b>    | <.01                      |
| <b>Random effects</b> |               | <b>Variance</b> |                  |                 |                           |
| Participant           | (intercept)   | 7.10            |                  |                 |                           |
| Residual              |               | 1.57            |                  |                 |                           |
