# Supplementary material
Source: publisher figshare collection journal article supplement (https://asha.figshare.com/articles/dataset/_/14963955)
Supplement: Supplementary file 2 [file 1]

**Supplemental Material S2.** Fixed and random effects in a mixed-effects model of fundamental frequency ( $f_0$ ) range.

| <b>Fixed effects</b>   |             | <b>Estimate</b> | <b><i>SE</i></b> | <b><i>t</i></b> | <b>Estimated <i>p</i></b> |
|------------------------|-------------|-----------------|------------------|-----------------|---------------------------|
| (intercept)            |             | 2.81            | 0.20             | <b>13.86</b>    | <.001                     |
| Condition              | DEG         | 0.10            | 0.19             | 0.55            | >.05                      |
| Age band               | 9–10        | 1.39            | 0.26             | <b>5.32</b>     | <.001                     |
|                        | 11–12       | 0.73            | 0.27             | <b>2.65</b>     | <.01                      |
|                        | 13–14       | 0.30            | 0.25             | 1.23            | >.05                      |
| Condition<br>*Age band | DEG, 9–10   | 0.35            | 0.24             | 1.42            | >.05                      |
|                        | DEG, 11–12  | 0.58            | 0.25             | <b>2.29</b>     | <.05                      |
|                        | DEG, 13–14  | 0.92            | 0.23             | <b>4.03</b>     | <.001                     |
| <b>Random effects</b>  |             | <b>Variance</b> |                  |                 |                           |
| Participant            | (intercept) | 0.47            |                  |                 |                           |
| Residual               |             | 0.35            |                  |                 |                           |

*Note.* Number of observations = 232; participants ( $N$ ) = 116.
