# Supplementary material
Source: publisher figshare collection journal article supplement (https://asha.figshare.com/articles/dataset/_/14963955)
Supplement: Supplementary file 3 [file 1]

**Supplemental Material S3.** Fixed and random effects in a mixed-effects model of articulation rate.

| <b>Fixed effects</b>       |                    | <b>Estimate</b> | <b>SE</b> | <b><i>t</i></b> | <b>Estimated <i>p</i></b> |
|----------------------------|--------------------|-----------------|-----------|-----------------|---------------------------|
| (intercept)                |                    | 5.03            | 0.15      | <b>33.60</b>    | <.001                     |
| Condition                  | DEG                | −1.10           | 0.16      | <b>−6.76</b>    | <.001                     |
| Sex                        | Female             | −0.77           | 0.22      | <b>−3.46</b>    | <.001                     |
| Age band                   | 9-10               | −1.30           | 0.19      | <b>−6.67</b>    | <.001                     |
|                            | 11-12              | −0.78           | 0.23      | <b>−3.37</b>    | <.001                     |
|                            | 13-14              | −0.86           | 0.18      | <b>−4.69</b>    | <.001                     |
| Condition * Sex            | DEG, Female        | 0.24            | 0.24      | 1.01            | >.05                      |
| Sex * Age band             | Female, 9–10       | 0.85            | 0.29      | <b>2.97</b>     | <.01                      |
|                            | Female, 11–12      | 0.43            | 0.31      | 1.38            | >.05                      |
|                            | Female, 13–14      | 0.63            | 0.27      | <b>2.34</b>     | <.05                      |
| Condition * Age band       | DEG, 9–10          | 0.49            | 0.21      | <b>2.34</b>     | <.05                      |
|                            | DEG, 11–12         | 0.20            | 0.25      | 0.80            | >.05                      |
|                            | DEG, 13–14         | 0.32            | 0.20      | 1.60            | >.05                      |
| Condition * Sex * Age band | DEG, Female, 9–10  | −0.90           | 0.31      | <b>−2.86</b>    | <.01                      |
|                            | DEG, Female, 11–12 | −0.34           | 0.34      | −1.02           | >.05                      |
|                            | DEG, Female, 13–14 | −0.39           | 0.29      | −1.33           | >.05                      |
| <b>Random effects</b>      |                    | <b>Variance</b> |           |                 |                           |
| Participant                | (intercept)        | 0.10            |           |                 |                           |
| Residual                   |                    | 0.15            |           |                 |                           |

*Note.* Number of observations = 232; participants (*N*) = 116. DEG = degraded transmission condition.
