# Supplementary material
Source: publisher figshare collection journal article supplement (https://asha.figshare.com/articles/dataset/_/14963955)
Supplement: Supplementary file 4 [file 1]

**Supplemental Material S4.** Fixed and random effects in a mixed-effects model of mean energy (1–3 kHz).

| <b>Fixed effects</b>  |             | <b>Estimate</b> | <b><i>SE</i></b> | <b><i>t</i></b> | <b>Estimated <i>p</i></b> |
|-----------------------|-------------|-----------------|------------------|-----------------|---------------------------|
| (intercept)           |             | 59.92           | 0.44             | <b>135.93</b>   | <.001                     |
| Condition             | DEG         | 1.08            | 0.23             | <b>4.67</b>     | <.001                     |
| Sex                   | Female      | 1.23            | 0.37             | <b>3.29</b>     | <.001                     |
| Age band              | 9–10        | 7.10            | 0.51             | <b>13.81</b>    | <.001                     |
|                       | 11–12       | 5.95            | 0.54             | <b>10.93</b>    | <.001                     |
|                       | 13–14       | 5.64            | 0.48             | <b>11.67</b>    | <.001                     |
| Condition * Sex       | DEG, Female | 0.63            | 0.33             | 1.92            | >.05                      |
| <b>Random effects</b> |             | <b>Variance</b> |                  |                 |                           |
| Participant           | (intercept) | 2.41            |                  |                 |                           |
| Residual              |             | 1.51            |                  |                 |                           |

*Note.* Number of observations = 230; participants (*N*) = 116. DEG = degraded transmission condition.
